# Supplementary material for: The Antibiotic Knowledge, Attitudes, and Behaviors of Patients Purchasing Antibiotics without Prescription: Results of National Survey
Source: Hindawi journal article supplement (doi:10.1155/2023/3306067), 2023-11-25
Supplement: f1 [file 3306067.f1.docx]

***Supplement 1. Overview of respondents***

| **Mosсow** | | | | | | |
| --- | --- | --- | --- | --- | --- | --- |
| *Interviewer 1* | | | | | | |
|  | | Age | Gender | Education | | Place of residence |
| Respondent 1 | | 23 | Male | Нigher education | | Urban |
| Respondent 2 | | 36 | Female | Нigher education | | Urban |
| Respondent 3 | | 67 | Male | Secondary education | | Urban |
| Respondent 4 | | 69 | Female | Нigher education | | Urban |
| *Interviewer 2* | | | | | | |
| Respondent 1 | | 26 | Male | Нigher education | | Urban |
| Respondent 2 | | 34 | Male | Secondary education | | Urban |
| Respondent 3 | | 25 | Female | Нigher education | | Urban |
| Respondent 4 | | 46 | Male | Secondary education | | Urban |
| Respondent 5 | | 47 | Female | General education | | Urban |
| Respondent 6 | | 46 | Male | Secondary education | | Urban |
| Respondent 7 | | 69 | Female | Нigher education | | Urban |
| Respondent 8 | | 24 | Female | Secondary education | | Urban |
| Respondent 9 | | 22 | Female | Secondary education | | Urban |
| Respondent 10 | | 66 | Female | General education | | Urban |
| **Saint Petersburg** | | | | | | |
| *Interviewer 1* | | | | | | |
| Respondent 1 | | 29 | Male | Secondary education | | Urban |
| Respondent 2 | | 59 | Female | Нigher education | | Urban |
| Respondent 3 | | 65 | Male | Secondary education | | Urban |
| *Interviewer 2* | | | | | | |
| Respondent 1 | | 21 | Male | Secondary education | | Urban |
| Respondent 2 | | 24 | Female | Secondary education | | Urban |
| Respondent 3 | | 46 | Male | Нigher education | | Urban |
| **Central Federal District** | | | | | | |
| **Smolensk** | | | | | | |
| Respondent 1 | | 19 | Male | Secondary education | | Urban |
| Respondent 2 | | 23 | Female | Нigher education | | Urban |
| Respondent 3 | | 19 | Female | Secondary education | | Urban |
| Respondent 4 | | 25 | Male | Нigher education | | Rural |
| Respondent 5 | | 20 | Female | General education | | Rural |
| Respondent 6 | | 54 | Male | Нigher education | | Urban |
| Respondent 7 | | 47 | Male | Secondary education | | Urban |
| Respondent 8 | | 49 | Male | General education | | Urban |
| Respondent 9 | | 56 | Female | Нigher education | | Urban |
| Respondent 10 | | 46 | Female | Secondary education | | Urban |
| Respondent 11 | | 47 | Male | Secondary education | | Rural |
| Respondent 12 | | 46 | Female | General education | | Rural |
| Respondent 13 | | 63 | Male | General education | | Urban |
| Respondent 14 | | 62 | Female | Secondary education | | Urban |
| Respondent 15 | | 65 | Male | Нigher education | | Rural |
| **Yaroslavl** | | | | | | |
| Respondent 1 | | 27 | Male | Secondary education | | Urban |
| Respondent 2 | | 26 | Male | Secondary education | | Urban |
| Respondent 3 | | 24 | Male | General education | | Urban |
| Respondent 4 | | 24 | Male | Secondary education | | Rural |
| Respondent 5 | | 20 | Male | General education | | Rural |
| Respondent 6 | | 45 | Male | Secondary education | | Urban |
| Respondent 7 | | 52 | Female | Secondary education | | Urban |
| Respondent 8 | | 49 | Female | Secondary education | | Rural |
| Respondent 9 | | 60 | Male | Нigher education | | Urban |
| Respondent 10 | | 65 | Male | Secondary education | | Urban |
| Respondent 11 | | 60 | Female | Secondary education | | Urban |
| Respondent 12 | | 60 | Female | Secondary education | | Urban |
| **North-Western Federal District** | | | | | | |
| **Arkhangelsk** | | | | | | |
| *Interviewer 1* | | | | | | |
| Respondent 1 | | 36 | Male | Secondary education | | Urban |
| Respondent 2 | | 58 | Female | Secondary education | | Urban |
| Respondent 3 | | 61 | Female | Secondary education | | Urban |
| *Interviewer 2* | | | | | | |
| Respondent 1 | | 28 | Male | General education | | Urban |
| Respondent 2 | | 37 | Female | General education | | Rural |
| Respondent 3 | | 46 | Male | Secondary education | | Rural |
| **Kaliningrad** | | | | | | |
| Respondent 1 | | 29 | Male | Нigher education | | Urban |
| Respondent 2 | | 48 | Female | Нigher education | | Rural |
| Respondent 3 | | 61 | Female | Secondary education | | Rural |
| **Southern Federal District** | | | | | | |
| **Volgograd** | | | | | | |
| Respondent 1 | | 23 | Male | Secondary education | | Urban |
| Respondent 2 | | 30 | Male | Нigher education | | Rural |
| Respondent 3 | | 23 | Female | Secondary education | | Rural |
| Respondent 4 | | 46 | Male | Secondary education | | Urban |
| Respondent 5 | | 48 | Female | Secondary education | | Urban |
| Respondent 6 | | 48 | Male | Secondary education | | Rural |
| Respondent 7 | | 64 | Female | Secondary education | | Urban |
| Respondent 8 | | 60 | Male | Secondary education | | Rural |
| **Krasnodar** | | | | | | |
| Respondent 1 | | 31 | Male | Нigher education | | Urban |
| Respondent 2 | | 36 | Male | Secondary education | | Rural |
| Respondent 3 | | 34 | Male | General education | | Rural |
| Respondent 4 | | 45 | Male | Нigher education | | Urban |
| Respondent 5 | | 46 | Female | Secondary education | | Urban |
| Respondent 6 | | 46 | Female | General education | | Rural |
| Respondent 7 | | 61 | Male | Secondary education | | Urban |
| Respondent 8 | | 61 | Female | Secondary education | | Urban |
| Respondent 9 | | 60 | Female | Нigher education | | Urban |
| **Volga Federal District** | | | | | | |
| **Saransk** | | | | | | |
| Respondent 1 | | 25 | Male | Secondary education | | Urban |
| Respondent 2 | | 25 | Male | Secondary education | | Urban |
| Respondent 3 | | 19 | Female | Secondary education | | Urban |
| Respondent 4 | | 23 | Female | Secondary education | | Urban |
| Respondent 5 | | 22 | Male | Secondary education | | Rural |
| Respondent 6 | | 45 | Male | Secondary education | | Urban |
| Respondent 7 | | 46 | Male | General education | | Urban |
| Respondent 8 | | 45 | Female | Secondary education | | Urban |
| Respondent 9 | | 45 | Female | Secondary education | | Urban |
| Respondent 10 | | 45 | Female | General education | | Rural |
| Respondent 11 | | 60 | Female | Secondary education | | Urban |
| Respondent 12 | | 60 | Female | Secondary education | | Urban |
| Respondent 13 | | 60 | Female | General education | | Urban |
| Respondent 14 | | 61 | Female | Secondary education | | Rural |
| **Kazan** | | | | | | |
| Respondent 1 | | 29 | Male | Нigher education | | Urban |
| Respondent 2 | | 29 | Male | Secondary education | | Urban |
| Respondent 3 | | 23 | Male | General education | | Urban |
| Respondent 4 | | 25 | Female | Secondary education | | Urban |
| Respondent 5 | | 33 | Female | Secondary education | | Urban |
| Respondent 6 | | 28 | Female | General education | | Urban |
| Respondent 7 | | 23 | Male | Secondary education | | Rural |
| Respondent 8 | | 26 | Male | General education | | Rural |
| Respondent 9 | | 47 | Male | Нigher education | | Urban |
| Respondent 10 | | 58 | Male | Secondary education | | Urban |
| Respondent 11 | | 50 | Female | Secondary education | | Urban |
| Respondent 12 | | 45 | Male | General education | | Rural |
| Respondent 13 | | 61 | Male | General education | | Urban |
| Respondent 14 | | 61 | Female | Нigher education | | Urban |
| Respondent 15 | | 60 | Female | Нigher education | | Urban |
| **Ural Federal District** | | | | | | |
| **Tyumen** | | | | | | |
| Respondent 1 | | 22 | Male | General education | | Urban |
| Respondent 2 | | 29 | Female | Нigher education | | Urban |
| Respondent 3 | | 62 | Male | General education | | Urban |
| Respondent 4 | | 68 | Female | Нigher education | | Urban |
| **Chelyabinsk** | | | | | | |
| Respondent 1 | | 34 | Male | Нigher education | | Urban |
| Respondent 2 | | 24 | Female | General education | | Urban |
| Respondent 3 | | 44 | Female | General education | | Rural |
| Respondent 4 | | 46 | Male | Нigher education | | Urban |
| Respondent 5 | | 59 | Male | General education | | Rural |
| Respondent 6 | | 62 | Female | Secondary education | | Urban |
| **Siberian Federal District** | | | | | | |
| **Novokuznetsk** | | | | | | |
| Respondent 1 | | 39 | Male | Нigher education | | Urban |
| Respondent 2 | | 44 | Female | Нigher education | | Urban |
| Respondent 3 | | 23 | Male | General education | | Rural |
| Respondent 4 | | 44 | Female | Secondary education | | Rural |
| Respondent 5 | | 46 | Female | Secondary education | | Urban |
| Respondent 6 | | 55 | Female | Нigher education | | Urban |
| Respondent 7 | | 57 | Male | Secondary education | | Rural |
| Respondent 8 | | 51 | Male | General education | | Rural |
| Respondent 9 | | 71 | Male | Secondary education | | Urban |
| **Krasnoyarsk** | | | | | | |
| Respondent 1 | | 32 | Male | Нigher education | | Urban |
| Respondent 2 | | 22 | Male | Secondary education | | Urban |
| Respondent 3 | | 21 | Male | General education | | Urban |
| Respondent 4 | | 19 | Female | General education | Rural | |
| Respondent 5 | | 35 | Male | Нigher education | | Rural |
| Respondent 6 | | 59 | Female | Secondary education | | Urban |
| Respondent 7 | | 55 | Female | Нigher education | | Rural |
| Respondent 8 | | 63 | Female | General education | | Urban |
| Respondent 9 | | 62 | Female | Secondary education | | Urban |
| **Far-Eastern Federal District** | | | | | | |
| **Yakutsk** | | | | | | |
| Respondent 1 | | 22 | Male | Нigher education | | Urban |
| Respondent 2 | | 35 | Female | Secondary education | | Urban |
| Respondent 3 | | 39 | Female | Нigher education | | Urban |
| Respondent 4 | | 46 | Female | Secondary education | | Urban |
| **Vladivostok** | | | | | | |
| Respondent 1 | | 29 | Female | Secondary education | | Urban |
| Respondent 2 | | 45 | Male | Secondary education | | Urban |
| Respondent 3 | | 54 | Female | Нigher education | | Urban |
| Respondent 4 | | 50 | Male | General education | | Rural |
| Respondent 5 | | 62 | Male | Secondary education | | Urban |
| **North Caucasian Federal District** | | | | | | |
| **Grozny** | | | | | | |
| Respondent 1 | | 31 | Male | General education | | Urban |
| Respondent 2 | | 34 | Male | Secondary education | | Rural |
| Respondent 3 | | 23 | Male | General education | | Rural |
| Respondent 4 | | 31 | Female | General education | | Rural |
| Respondent 5 | | 45 | Female | Secondary education | | Rural |
| Respondent 6 | | 60 | Female | Нigher education | | Rural |
| **Stavropol** | | | | | | |
| Respondent 1 | 20 | | Female | Secondary education | | Rural |
| Respondent 2 | 46 | | Male | General education | | Rural |
| Respondent 3 | 64 | | Female | Нigher education | | Urban |
| Respondent 4 | 67 | | Female | Secondary education | | Urban |
